# Supplementary material for: Brucella neotomae Infection in Humans, Costa Rica
Source: PubMed Central journal article supplement (PMC5443450; doi:10.3201/eid2306.162018), 2017-06
Supplement: 16-2018-Techapp-s1.pdf [file 16-2018-Techapp-s1.pdf]

# *Brucella neotomae* Infection in Humans

## Technical Appendix

**Technical Appendix Table 1.** Protein mass values of *Brucella* reference strains and bneohCR2\*

| Peak N° | Mass  | Bce | Bpi | Bme | Bab | Bsu | Bca | Bov | Bmi | BneK | BneCR |
|---------|-------|-----|-----|-----|-----|-----|-----|-----|-----|------|-------|
| 1       | 2771  | 0   | 1   | 0   | 0   | 0   | 0   | 0   | 0   | 0    | 0     |
| 2       | 2919  | 0   | 0   | 0   | 0   | 1   | 0   | 0   | 0   | 0    | 0     |
| 3       | 3026  | 0   | 1   | 1   | 1   | 1   | 1   | 1   | 0   | 0    | 0     |
| 4       | 3181  | 1   | 1   | 1   | 0   | 1   | 1   | 0   | 0   | 0    | 0     |
| 5       | 3407  | 0   | 0   | 0   | 1   | 0   | 0   | 1   | 0   | 0    | 0     |
| 6       | 3700  | 1   | 1   | 1   | 1   | 1   | 1   | 1   | 1   | 1    | 1     |
| 7       | 3831  | 0   | 0   | 0   | 0   | 0   | 1   | 1   | 0   | 0    | 0     |
| 8       | 4126  | 0   | 0   | 0   | 1   | 0   | 0   | 1   | 0   | 0    | 0     |
| 9       | 4541  | 0   | 1   | 1   | 1   | 0   | 1   | 1   | 0   | 1    | 1     |
| 10      | 4558  | 1   | 0   | 0   | 1   | 1   | 0   | 0   | 1   | 0    | 0     |
| 11      | 4854  | 1   | 1   | 1   | 1   | 1   | 1   | 1   | 1   | 1    | 1     |
| 12      | 4898  | 0   | 0   | 1   | 0   | 1   | 1   | 0   | 0   | 0    | 0     |
| 13      | 5112  | 0   | 0   | 0   | 1   | 0   | 0   | 1   | 0   | 0    | 0     |
| 14      | 5135  | 1   | 1   | 1   | 1   | 1   | 1   | 0   | 0   | 1    | 1     |
| 15      | 5169  | 1   | 0   | 1   | 0   | 1   | 1   | 1   | 1   | 1    | 0     |
| 16      | 5546  | 1   | 1   | 1   | 0   | 0   | 0   | 0   | 0   | 0    | 0     |
| 17      | 5686  | 1   | 1   | 1   | 0   | 1   | 1   | 1   | 1   | 1    | 1     |
| 18      | 5772  | 1   | 1   | 0   | 0   | 0   | 1   | 0   | 0   | 0    | 0     |
| 19      | 5834  | 0   | 0   | 0   | 1   | 1   | 1   | 0   | 0   | 0    | 0     |
| 20      | 5876  | 1   | 1   | 0   | 1   | 0   | 0   | 1   | 0   | 1    | 1     |
| 21      | 5940  | 0   | 0   | 0   | 1   | 0   | 0   | 0   | 1   | 1    | 0     |
| 22      | 6039  | 0   | 0   | 1   | 0   | 1   | 0   | 0   | 1   | 0    | 0     |
| 23      | 6049  | 0   | 0   | 0   | 1   | 0   | 0   | 0   | 0   | 1    | 1     |
| 24      | 6150  | 0   | 0   | 0   | 1   | 1   | 0   | 0   | 0   | 0    | 0     |
| 25      | 6289  | 1   | 1   | 1   | 1   | 1   | 1   | 1   | 1   | 1    | 1     |
| 26      | 6322  | 0   | 0   | 1   | 0   | 1   | 0   | 0   | 0   | 0    | 0     |
| 27      | 6369  | 1   | 1   | 0   | 1   | 0   | 1   | 0   | 0   | 0    | 0     |
| 28      | 6420  | 0   | 0   | 1   | 1   | 1   | 0   | 0   | 0   | 0    | 0     |
| 29      | 6542  | 1   | 1   | 1   | 1   | 1   | 1   | 0   | 1   | 1    | 0     |
| 30      | 6676  | 1   | 1   | 1   | 1   | 1   | 1   | 1   | 0   | 1    | 1     |
| 31      | 7056  | 1   | 1   | 1   | 0   | 1   | 1   | 1   | 1   | 1    | 1     |
| 32      | 7183  | 1   | 1   | 1   | 1   | 1   | 0   | 0   | 0   | 1    | 0     |
| 33      | 7270  | 0   | 0   | 0   | 1   | 0   | 0   | 0   | 0   | 0    | 0     |
| 34      | 7309  | 0   | 0   | 0   | 0   | 0   | 1   | 0   | 0   | 0    | 0     |
| 35      | 7362  | 0   | 0   | 0   | 0   | 0   | 0   | 0   | 1   | 0    | 0     |
| 36      | 7400  | 1   | 1   | 1   | 0   | 1   | 1   | 1   | 1   | 1    | 1     |
| 37      | 7518  | 1   | 1   | 1   | 0   | 1   | 1   | 1   | 1   | 1    | 1     |
| 38      | 7660  | 1   | 0   | 1   | 0   | 1   | 1   | 1   | 0   | 1    | 1     |
| 39      | 7785  | 1   | 0   | 1   | 0   | 1   | 1   | 1   | 0   | 0    | 0     |
| 40      | 8045  | 1   | 1   | 1   | 0   | 1   | 1   | 1   | 1   | 0    | 0     |
| 41      | 8121  | 0   | 1   | 0   | 0   | 0   | 0   | 0   | 0   | 0    | 0     |
| 42      | 8192  | 1   | 0   | 1   | 1   | 1   | 1   | 1   | 0   | 1    | 0     |
| 43      | 8247  | 1   | 1   | 1   | 0   | 1   | 0   | 1   | 0   | 1    | 1     |
| 44      | 8589  | 0   | 0   | 0   | 0   | 1   | 0   | 0   | 0   | 0    | 0     |
| 45      | 8685  | 1   | 1   | 1   | 1   | 1   | 1   | 1   | 0   | 1    | 1     |
| 46      | 8730  | 1   | 1   | 1   | 1   | 1   | 1   | 0   | 1   | 1    | 1     |
| 47      | 8823  | 1   | 1   | 1   | 0   | 1   | 1   | 1   | 1   | 0    | 0     |
| 48      | 9082  | 0   | 1   | 1   | 0   | 0   | 1   | 1   | 0   | 1    | 1     |
| 49      | 9113  | 1   | 0   | 0   | 1   | 1   | 0   | 0   | 1   | 0    | 0     |
| 50      | 9319  | 1   | 1   | 1   | 1   | 1   | 1   | 1   | 1   | 1    | 0     |
| 51      | 9800  | 0   | 0   | 1   | 0   | 1   | 1   | 1   | 0   | 1    | 1     |
| 52      | 9827  | 0   | 0   | 0   | 1   | 0   | 0   | 0   | 1   | 0    | 0     |
| 53      | 9970  | 0   | 0   | 1   | 0   | 0   | 0   | 1   | 0   | 0    | 0     |
| 54      | 10085 | 1   | 1   | 0   | 0   | 1   | 1   | 0   | 1   | 1    | 1     |
| 55      | 10227 | 0   | 0   | 0   | 1   | 0   | 0   | 1   | 0   | 1    | 1     |
| 56      | 10271 | 1   | 1   | 1   | 1   | 1   | 1   | 0   | 1   | 0    | 0     |
| 57      | 10417 | 1   | 1   | 1   | 1   | 1   | 1   | 1   | 1   | 1    | 0     |

| Peak N°                                                                                                                                                                                                                                                                                                                                | Mass | Bce | Bpi | Bme | Bab | Bsu | Bca | Bov | Bmi | BneK | BneCR |
|----------------------------------------------------------------------------------------------------------------------------------------------------------------------------------------------------------------------------------------------------------------------------------------------------------------------------------------|------|-----|-----|-----|-----|-----|-----|-----|-----|------|-------|
| *Bce, <i>B. ceti</i> bmarCR17; Bpi, <i>B. pinnipedialis</i> B2/94; Bme, <i>B. melitensis</i> Rev1; Bab, <i>B. abortus</i> 2308; Bsu, <i>B. suis</i> s2; Bca, <i>B. canis</i> CR12; Bov, <i>B. ovis</i> PA; Bmi, <i>B. microti</i> CCM4915; BneK, <i>B. neotomae</i> 5K33, BneCR, <i>B. neotomae</i> bneohCR2; 0, absence; 1, presence. |      |     |     |     |     |     |     |     |     |      |       |

**Technical Appendix Table 2.** General information and accession numbers of the genomes included in the phylogenetic analysis\*

| Strain ID                             | Sample                                        | Host                | Country          | Accession number              |
|---------------------------------------|-----------------------------------------------|---------------------|------------------|-------------------------------|
| <i>B. abortus</i> 9–941               | ND                                            | Bovine              | USA              | NC_006932.1 & NC_006933.1     |
| <i>B. abortus</i> 2308                | Aborted fetus                                 | Bovine              | USA              | NC_007618.1 & NC_007624.1     |
| <i>B. abortus</i> 2308W               | Aborted fetus                                 | Bovine              | USA              | ERS668782                     |
| <i>B. abortus</i> 01–0065             | ND                                            | Bison               | USA              | GCA_000413795.1               |
| <i>B. abortus</i> 104M                | Placenta                                      | Cattle              | China            | GCA_001296965.1               |
| <i>B. abortus</i> 134                 | Blood                                         | Human               | China            | GCA_000298635.1               |
| <i>B. abortus</i> CNBG 1432           | Blood                                         | Human               | Argentina        | GCA_000366525.1               |
| <i>B. abortus</i> CNBG 308            | Blood                                         | Human               | Argentina        | GCA_000366545.1               |
| <i>B. abortus</i> 3196                | ND                                            | ND                  | ND               | GCA_000740945.1               |
| <i>B. abortus</i> 63/144              | ND                                            | Human               | France           | GCA_000370025.1               |
| <i>B. abortus</i> 63/59               | ND                                            | ND                  | Poland           | GCA_000366605.1               |
| <i>B. abortus</i> 63/75               | ND                                            | ND                  | ND               | GCA_000740295.1               |
| <i>B. abortus</i> 64/108              | ND                                            | Goat                | India            | GCA_000370085.1               |
| <i>B. canis</i> ATCC 23365            | Allantoic fluid of aborted puppy              | Dog                 | ND               | NC_010103.1 & NC_010104.1     |
| <i>B. canis</i> HSK A52141            | Blood                                         | Dog                 | South Korea      | GCA_000238195.1               |
| <i>B. canis</i> Oliveri               | ND                                            | ND                  | Colombia         | GCA_000530495.1               |
| <i>B. canis</i> RM6/66                | ND                                            | ND                  | ND               | GCA_000740335.1               |
| <i>B. canis</i> SVA13                 | Aborted material                              | Dog                 | Sweden           | GCA_000691585.1               |
| <i>Brucella ceti</i> TE10759–12       | Brain and spleen                              | Striped dolphin     | Italy            | CP006896 & CP006897           |
| <i>B. ceti</i> TE28753                | Brain                                         | Striped dolphin     | Italy            | CP006898.1 & CP006899.1       |
| <i>B. ceti</i> F23–97                 | ND                                            | Bottle nose dolphin | France           | NZ_AQKR00000000.1             |
| <i>B. melitensis</i> 16M ATCC 23456   | ND                                            | Goat                | USA              | NC_003317.1 & NC_003318.1     |
| <i>B. melitensis</i> ATCC 23457       | ND                                            | Goat                | Turkey           | NC_012441.1 & NC_012442.1     |
| <i>B. melitensis</i> M28              | ND                                            | Sheep               | Vaccine in China | NC_017244.1 & NC_017245.1     |
| <i>B. melitensis</i> M5–90            | Vaccine                                       | Vaccine from M28    | China            | NC_017246.1 & NC_017247.1     |
| <i>B. melitensis</i> NI               | Aborted fetus                                 | Bovine              | China            | NC_017248.1 & NC_017283.1     |
| <i>B. melitensis</i> bv. 3 str. Ether | ND                                            | ND                  | ND               | NZ_CP007760.1 & NZ_CP007761.1 |
| <i>B. melitensis</i> 20236            | ND                                            | ND                  | ND               | NZ_CP008750.1 & NZ_CP008751.1 |
| <i>B. melitensis</i> 2008724259       | ND                                            | ND                  | ND               | NZ_CP016983.1 & NZ_CP016984.1 |
| <i>B. melitensis</i> bv. 2 str. 63/9  | ND                                            | ND                  | ND               | NZ_CP007789.1 & NZ_CP007788.1 |
| <i>B. microti</i> CCM 4915            | Systemic infection                            | Common voles        | Czech Republic   | NC_013119.1 & NC_013118.1     |
| <i>B. neotomae</i> 5K33               | Pooled tissue: lung, spleen, liver and kidney | Desert wood rat     | Utah, USA        | JMSC01 GCA_000742255.1        |
| bneohCR1                              | CSF                                           | Human               | Costa Rica       | ERS1624467†                   |
| bneohCR2                              | CSF                                           | Human               | Costa Rica       | ERS1563929†                   |
| <i>B. ovis</i> ATCC 25840             | Tissue                                        | ND                  | Australia        | ERS1563928†                   |
| <i>B. ovis</i> IntaBari-2008–114–542  | ND                                            | ND                  | Argentina        | NC_009504.1 & GCA_000365985.1 |
| <i>B. ovis</i> IntaBari-1993–758      | ND                                            | ND                  | Argentina        | GCA_000366005.1               |
| <i>B. ovis</i> IntaBari-2009–88–4     | ND                                            | ND                  | Argentina        | GCA_000366045.1               |
| <i>B. ovis</i> F8/05B                 | ND                                            | ND                  | ND               | GCA_000367085.1               |
| <i>Brucella pinnipedialis</i> B2/94   | Spleen                                        | Common seal         | Scotland         | NC_015857.1 & NC_015858.1     |
| <i>B. suis</i> 1330                   | ND                                            | Swine               | ND               | NC_004310.3 & NC_004311.2     |
| <i>B. suis</i> ATCC 23445             | ND                                            | Swine               | Denmark          | NC_010169.1 & NC_010167.1     |

| Strain ID                     | Sample        | Host                | Country        | Accession number                 |
|-------------------------------|---------------|---------------------|----------------|----------------------------------|
| <i>B. suis</i> VBI22          | Milk          | Bovine              | USA            | NC_016797.1 &<br>NC_016775.1     |
| <i>B. suis</i> bv.1 str. S2   | Vaccine       | Vaccine in China    | China          | NZ_CP006961.1 &<br>NZ_CP006962.1 |
| <i>B. suis</i> bv. 2 PT09143  | ND            | Wild boar           | Spain/Portugal | NZ_CP007691.1<br>&NZ_CP007692.1  |
| <i>B. suis</i> bv. 3 str. 686 | ND            | ND                  | ND             | NZ_CP007719.1 &<br>NZ_CP007718.1 |
| <i>B. suis</i> bv. 5 str. 513 | ND            | ND                  | ND             | NZ_DS999724.1                    |
| <i>B. suis</i> bv. 4 str. 40  | ND            | ND                  | ND             | NZ_GG703793.1                    |
| <i>B. suis</i> F5/05-4        | ND            | ND                  | ND             | NZ_KB850877.1                    |
| <i>Brucella</i> sp. F5-99     | Aborted fetus | Bottle nose dolphin | USA            | NZ_ACF00000000                   |

\*CSF, cerebrospinal fluid; ND, no data available.

†Isolates and/or WGS described in this study.
